# Supplementary material
Source: Research Square preprint supplement (doi:10.21203/rs.3.rs-9947061/v1)
Supplement: Supplementary file 1 [file 067430344efffa38ca125816.xlsx]

## Sheet: ReadMe
Supplementary Data 2: Explorys
Observations were excluded if patients had chronic conditions known to affect the respective biomarker, or if an acute diagnosis occurred within ±30 days of measurement
Worksheet	Contents
Diagnosis-Biomarker	Exclusion criteria due to chronic conditions
Acute-Chronic	Exclusion criteria due to an acute diagnosis occuring within ±30 days of measurement

## Sheet: Diagnosis-Biomarker
Diagnosis	Bilirubin	ALT	AST	Glucose	Urea Nitrogen	Cholesterol	Bile Acid	Phe	Cortisol	Vitamin B6
B15-B19 Viral hepatitis	✅	✅	✅				✅	✅
K70-K76 Liver diseases	✅	✅	✅	✅	✅	✅	✅	✅		✅
K80-K83 Biliary disease	✅					✅	✅
E80 Bilirubin metabolism	✅
E08-E13 Diabetes				✅		✅			✅
E78 Lipid disorders						✅
E24 Cushing syndrome				✅		✅			✅
E27 Adrenal disorders				✅					✅
E03-E05 Thyroid		✅	✅	✅		✅			✅
N17-N19 & N04 Kidney					✅					✅
D55-D59 Hemolytic anemia	✅
E70 Amino acid disorders								✅
A40-A41 Sepsis	✅	✅	✅	✅	✅		✅	✅	✅	✅
I21-I22 Heart attack		✅	✅		✅
K50-K51 IBD							✅			✅
K90 Malabsorption							✅			✅
G71 Primary muscle disorders			✅
M60-M63 Muscle disorders			✅
E22-E23 Pituitary disorders				✅		✅			✅
E44-E46 Malnutrition	✅	✅	✅		✅	✅		✅		✅
M05-M06 Rheumatoid arthritis										✅
E66 Obesity				✅		✅

## Sheet: Acute-Chronic
Diagnosis	Chronic	Acute
B18	✅
B15-B17 & B19 Viral hepatitis		✅
K70-K76 (except K72.0) Liver diseases	✅
K72.0		✅
K80-K83 Biliary disease	✅
E80 Bilirubin metabolism	✅
E08-E13 Diabetes	✅
E78 Lipid disorders	✅
E24 Cushing syndrome	✅
E27 Adrenal disorders	✅
E03-E05 Thyroid	✅
N17		✅
N18-N19 & N04 Kidney	✅
D55-D59 Hemolytic anemia	✅
E70 Amino acid disorders	✅
A40-A41 Sepsis		✅
I21-I22 Heart attack		✅
K50-K51 IBD	✅
K90 Malabsorption	✅
G71 Primary muscle disorders	✅
M62		✅
M60-M61 & M63 Muscle disorders	✅
E22-E23 Pituitary disorders	✅
E44-E46 Malnutrition	✅
M05-M06 Rheumatoid arthritis	✅
E66 Obesity	✅
