# Supplementary material
Source: Research Square preprint supplement (doi:10.21203/rs.3.rs-9947061/v1)
Supplement: Supplementary file 2 [file cb2768fc4268639a73f354b9.xlsx]

## Sheet: Read_Me
Supplementary Data 1: Metabolite constraints
Worksheet	Contents	Notes
Media		All metabolites that are in the minimal media
	Rxns	Human1 reaction identifiers
	MetName	Metabolite name
	lb	Lower bound (mmol.gDW-1.h-1)
	ub	Upperbound (mmol.gDW-1.h-1)
ReactionsBiomass		Additions to the minimal media to allow for biomass production.
	Rxns	Human1 reaction identifiers
	Reaction description	Exchange of …
	Maximum uptake (lb)	mmol.gDW-1.h-1
LipidDeg		Metabolites available from cell death and media
	Rxns	Human1 reaction identifiers
	Reaction description	Exchange of …
	T1	Time point 1 day
	T3	Time point 3 days
	T7	Time point 7 days
	T10	Time point 10 days
AAToxT7		Constraints from measured amino acids
	AA	Amino acid
	Rxns	Human1 reaction identifiers
	Fit	Fitted exchange (mmol.gDW-1.h-1)
	lb	Lower bound (mmol.gDW-1.h-1)
	ub	Upperbound (mmol.gDW-1.h-1)

## Sheet: Media
Rxns	MetName	lb	ub
MAR09730	Albumin	-1e-07	1000
MAR04140	ApoTransferin	-1e-07	1000
MAR09080	Zinc	-0.0127577	1000
MAR09363	L-cystine	-0.579322	1000
MAR09061	L-alanine	-3.89866	1000
MAR09066	L-argininium(1+)	-1.9311	1000
MAR09082	calcium(2+)	-6.98376	1000
MAR09083	Choline	-0.0928037	1000
MAR09150	Chloride	-463.738	1000
MAR09058	carbon dioxide	0	1000
MAR09288	carbon monoxide	0	1000
MAR09076	Fe2+	0	1000
MAR09096	Fe3+	-0.000479	1000
MAR09146	Folate	-0.00219018	1000
MAR09140	D-Galactose	-21.25	1000
MAR09034	D-glucose	-34.8792	1000
MAR09063	L-glutamine	-3.89866	1000
MAR09067	Glycine	-0.772674	1000
MAR09047	Water	-1000	1000
MAR09079	proton	-1	1000
MAR09078	Bicarbonate	-101.27	1000
MAR09038	L-histidine	-0.774115	0
MAR09039	L-isoleucine	-2.31405	0
MAR09361	myo-inositol	-0.098735	1000
MAR09081	potassium	-20.748	1000
MAR09040	L-leucine	-2.31405	0
MAR09041	L-lysinium(1+)	-2.31892	0
MAR09042	L-methionine	-0.581822	0
MAR09077	Sodium	-541.372	1000
MAR09378	Nicotinamide	-0.0079157	1000
MAR09149	Nitrite	-0.000479	1000
MAR09048	O2	-200	0
MAR09087	Ornithine	-1.17039	1000
MAR09043	L-phenylalanine	-1.15876	0
MAR09072	hydrogenphosphate	-3.38415	1000
MAR09145	(R)-Pantothenate	-0.00440952	1000
MAR09068	L-proline	-0.503819	1000
MAR09400	Pyridoxal	-0.00115667	1000
MAR09144	Pyridoxine	-0.00457143	1000
MAR09143	Riboflavin	-0.00440952	1000
MAR09169	selenate	-5.59005e-05	1000
MAR09069	L-serine	-0.772733	1000
MAR09074	sulfate	-3.13776	1000
MAR09159	Thiamin	-0.00365706	1000
MAR09044	L-threonine	-2.3146	0
MAR09045	L-tryptophan	-0.248041	0
MAR09064	L-tyrosine	-1.15461	1000
MAR09046	L-valine	-2.31061	0

## Sheet: ReactionsBiomass
Rxns	Reaction description	Maximum uptake (mmol.gDW-1.h-1)	Description
MAR09110	Exchange of biocytin	-1.6e-05	Biocytin is a molecule formed when biotin (vitamin B7) binds to the amino acid lysine, and it plays important roles in various carboxylation reactions in human metabolism.
MAR09152	Exchange of alpha-tocotrienol	-1.6e-05	Vitamin E, anti-oxidant, role in lipid metabolism
MAR09154	Exchange of gamma-tocotrienol	-1.6e-05	Another form of vitamin E
MAR09167	Exchange of lipoic acid	-1.6e-05	Co-factor for pyruvate dehydrogenase and other amino acid reactions
MAR09269	Exchange of aquacob(III)alamin	-1.6e-05	Vitamin B12, amongst others cofactor for methylmalonyl-CoA mutase
MAR13067	Exchange of retinyl palmitate	-0.00022	Storage of Vitamin A
MAR10027	Exchange of LacCer pool	-0.33096	The LacCer pool in Human1 represents the metabolic availability of lactosylceramide

## Sheet: LipidDeg
Rxns	Reaction description	T1	T3	T7	T10
MAR09808	Exchange of propanoate	-0.000107075	-8.77606e-05	-0.000407379	-0.000157397
MAR09812	Exchange of heptylic acid	-0.000111315	-9.12363e-05	-0.000423513	-0.000163631
MAR09813	Exchange of octanoic acid	-0.000111315	-9.12363e-05	-0.000423513	-0.000163631
MAR09034	Exchange of glucose	-34.8792	-34.8792	-34.8792	-34.8792
MAR09038	Exchange of histidine	-0.774115	-0.774115	-0.774115	-0.774115
MAR09039	Exchange of isoleucine	-2.31405	-2.31405	-2.31405	-2.31405
MAR09040	Exchange of leucine	-2.31405	-2.31405	-2.31405	-2.31405
MAR09041	Exchange of lysine	-2.31902	-2.319	-2.31933	-2.31907
MAR09042	Exchange of methionine	-0.582133	-0.582077	-0.583007	-0.58228
MAR09043	Exchange of phenylalanine	-1.15876	-1.15876	-1.15876	-1.15876
MAR09044	Exchange of threonine	-2.3146	-2.3146	-2.3146	-2.3146
MAR09045	Exchange of tryptophan	-0.248041	-0.248041	-0.248041	-0.248041
MAR09046	Exchange of valine	-2.31061	-2.31061	-2.31061	-2.31061
MAR09047	Exchange of H2O	-1000	-1000	-1000	-1000
MAR09048	Exchange of O2	-200	-200	-200	-200
MAR09058	Exchange of CO2	-0.000246181	-0.000201775	-0.000936626	-0.000361879
MAR09061	Exchange of alanine	-3.89866	-3.89866	-3.89866	-3.89866
MAR09063	Exchange of glutamine	-3.89866	-3.89866	-3.89866	-3.89866
MAR09064	Exchange of tyrosine	-1.15461	-1.15461	-1.15461	-1.15461
MAR09066	Exchange of arginine	-1.9311	-1.9311	-1.9311	-1.9311
MAR09067	Exchange of glycine	-0.772674	-0.772674	-0.772674	-0.772674
MAR09068	Exchange of proline	-0.503819	-0.503819	-0.503819	-0.503819
MAR09069	Exchange of serine	-0.77314	-0.773066	-0.774281	-0.773331
MAR09071	Exchange of glutamate	-0.000108179	-8.86654e-05	-0.000411579	-0.00015902
MAR09072	Exchange of Pi	-3.38443	-3.38438	-3.38521	-3.38456
MAR09073	Exchange of NH3	-0.000225439	-0.000184774	-0.000857709	-0.000331389
MAR09074	Exchange of sulfate	-3.13787	-3.13785	-3.13817	-3.13792
MAR09077	Exchange of Na+	-541.372	-541.372	-541.373	-541.372
MAR09078	Exchange of HCO3-	-101.27	-101.27	-101.27	-101.27
MAR09079	Exchange of H+	-1	-1	-1	-1
MAR09080	Exchange of zinc	-0.0129719	-0.0129332	-0.0135725	-0.0130725
MAR09081	Exchange of K+	-20.748	-20.748	-20.748	-20.748
MAR09082	Exchange of Ca2+	-6.98376	-6.98376	-6.98376	-6.98376
MAR09083	Exchange of choline	-0.0931212	-0.0930639	-0.0940116	-0.0932704
MAR09086	Exchange of acetate	-0.000544691	-0.000446439	-0.00207234	-0.00080068
MAR09087	Exchange of ornithine	-1.17039	-1.17039	-1.17039	-1.17039
MAR09088	Exchange of sulfite	-0.0004283	-0.000351042	-0.00162952	-0.000629588
MAR09091	Exchange of 4-aminobutyrate	-0.000235518	-0.000193035	-0.000896057	-0.000346205
MAR09092	Exchange of dopamine	-0.000226627	-0.000185748	-0.000862229	-0.000333135
MAR09096	Exchange of Fe3+	-0.000743325	-0.000695646	-0.00148466	-0.00086755
MAR09098	Exchange of D-alanine	-0.000116431	-9.5429e-05	-0.000442975	-0.00017115
MAR09109	Exchange of biotin	-0.000107808	-8.83617e-05	-0.000410169	-0.000158475
MAR09110	Exchange of biocytin	-1.59987e-05	-1.59987e-05	-1.59987e-05	-1.59987e-05
MAR09129	Exchange of estradiol-17beta 3-glucuronide	-0.000107075	-8.77606e-05	-0.000407379	-0.000157397
MAR09132	Exchange of acetoacetate	-0.000103658	-8.49597e-05	-0.000394378	-0.000152374
MAR09135	Exchange of L-lactate	-0.000119466	-9.79163e-05	-0.000454521	-0.000175611
MAR09136	Exchange of D-lactate	-0.000109253	-8.95456e-05	-0.000415665	-0.000160598
MAR09140	Exchange of galactose	-21.25	-21.25	-21.25	-21.25
MAR09141	Exchange of ADP-ribose	-0.000107075	-8.77606e-05	-0.000407379	-0.000157397
MAR09143	Exchange of riboflavin	-0.00440952	-0.00440952	-0.00440952	-0.00440952
MAR09144	Exchange of pyridoxine	-0.00457143	-0.00457143	-0.00457143	-0.00457143
MAR09145	Exchange of pantothenate	-0.00440952	-0.00440952	-0.00440952	-0.00440952
MAR09146	Exchange of folate	-0.00219018	-0.00219018	-0.00219018	-0.00219018
MAR09149	Exchange of nitrite	-0.000479	-0.000479	-0.000479	-0.000479
MAR09150	Exchange of chloride	-463.738	-463.738	-463.738	-463.738
MAR09152	Exchange of alpha-tocotrienol	-1.59987e-05	-1.59987e-05	-1.59987e-05	-1.59987e-05
MAR09154	Exchange of gamma-tocotrienol	-1.59987e-05	-1.59987e-05	-1.59987e-05	-1.59987e-05
MAR09159	Exchange of thiamin	-0.00376838	-0.0037483	-0.00408057	-0.00382069
MAR09164	Exchange of malonate	-0.000105567	-8.65245e-05	-0.000401641	-0.00015518
MAR09167	Exchange of lipoic acid	-1.59987e-05	-1.59987e-05	-1.59987e-05	-1.59987e-05
MAR09169	Exchange of selenate	-5.59e-05	-5.59e-05	-5.59e-05	-5.59e-05
MAR09201	Exchange of citrulline	-0.000107075	-8.77606e-05	-0.000407379	-0.000157397
MAR09205	Exchange of 10-formyl-THF	-0.000104829	-8.59195e-05	-0.000398833	-0.000154095
MAR09209	Exchange of fatty acid pool	-0.000104829	-8.59195e-05	-0.000398833	-0.000154095
MAR09213	Exchange of 4-nitrocatechol	-0.000217005	-0.000177862	-0.000825622	-0.000318991
MAR09222	Exchange of D-3-amino-isobutanoate	-0.000107956	-8.84829e-05	-0.000410732	-0.000158692
MAR09225	Exchange of isocaproic-aldehyde	-0.000115311	-9.45114e-05	-0.000438716	-0.000169504
MAR09229	Exchange of 5-alpha-dihydrotestosterone	-0.000111315	-9.12363e-05	-0.000423513	-0.000163631
MAR09230	Exchange of 5alpha-dihydrotestosterone-glucuronide	-0.000107075	-8.77606e-05	-0.000407379	-0.000157397
MAR09231	Exchange of 5alpha-dihydrotestosterone-sulfate	-0.000218109	-0.000178766	-0.000829821	-0.000320614
MAR09237	Exchange of 6beta-hydroxytestosterone	-0.000109227	-8.95246e-05	-0.000415568	-0.000160561
MAR09242	Exchange of acetaldehyde	-0.000221246	-0.000181337	-0.000841756	-0.000325225
MAR09244	Exchange of type III A glycolipid	-0.000104829	-8.59195e-05	-0.000398833	-0.000154095
MAR09245	Exchange of type IIIAb	-0.000104829	-8.59195e-05	-0.000398833	-0.000154095
MAR09246	Exchange of N-acetylglucosamine	-0.000103658	-8.49597e-05	-0.000394378	-0.000152374
MAR09248	Exchange of sialyl(1,3)-sialyl(2,6)-galactosylgloboside	-9.69973e-05	-7.95008e-05	-0.000369038	-0.000142583
MAR09249	Exchange of sialyl(2,3)-sialyl(2,6)-galactosylgloboside	-9.69973e-05	-7.95008e-05	-0.000369038	-0.000142583
MAR09250	Exchange of 3,8-LD1	-9.80147e-05	-8.03347e-05	-0.000372909	-0.000144079
MAR09251	Exchange of disialylgalactosylgloboside	-9.69973e-05	-7.95008e-05	-0.000369038	-0.000142583
MAR09252	Exchange of VI3NeuAc-nLc6Cer	-9.99366e-05	-8.19099e-05	-0.000380221	-0.000146904
MAR09253	Exchange of adenine	-0.000115311	-9.45114e-05	-0.000438716	-0.000169504
MAR09254	Exchange of adenosine	-0.000107075	-8.77606e-05	-0.000407379	-0.000157397
MAR09257	Exchange of etiocholan-3alpha-ol-17-one 3-glucuronide	-0.000103658	-8.49597e-05	-0.000394378	-0.000152374
MAR09260	Exchange of beta-alanine	-0.000109242	-8.95371e-05	-0.000415626	-0.000160583
MAR09262	Exchange of AMP	-0.000236677	-0.000193985	-0.000900468	-0.000347909
MAR09264	Exchange of androsterone-glucuronide	-0.000107075	-8.77606e-05	-0.000407379	-0.000157397
MAR09269	Exchange of aquacob(III)alamin	-1.59987e-05	-1.59987e-05	-1.59987e-05	-1.59987e-05
MAR09285	Exchange of cholesterol	-0.00010993	-9.01009e-05	-0.000418243	-0.000161594
MAR09287	Exchange of CMP	-0.00020609	-0.000168915	-0.000784092	-0.000302946
MAR09290	Exchange of creatine	-0.000110668	-9.07056e-05	-0.00042105	-0.000162679
MAR09294	Exchange of corticosterone	-0.000115311	-9.45114e-05	-0.000438716	-0.000169504
MAR09295	Exchange of cytidine	-0.000107075	-8.77606e-05	-0.000407379	-0.000157397
MAR09296	Exchange of deoxycytidine	-0.000219748	-0.00018011	-0.000836059	-0.000323024
MAR09297	Exchange of deoxyadenosine	-0.000107075	-8.77606e-05	-0.000407379	-0.000157397
MAR09300	Exchange of deoxyguanosine	-0.000107075	-8.77606e-05	-0.000407379	-0.000157397
MAR09303	Exchange of dihydrofolate	-0.000104829	-8.59195e-05	-0.000398833	-0.000154095
MAR09304	Exchange of digalactosylceramidesulfate	-9.99366e-05	-8.19099e-05	-0.000380221	-0.000146904
MAR09307	Exchange of 2,6-dimethylheptanoyl-carnitine	-9.88009e-05	-8.09791e-05	-0.0003759	-0.000145235
MAR09310	Exchange of deoxyuridine	-0.000107075	-8.77606e-05	-0.000407379	-0.000157397
MAR09313	Exchange of hydroxylated-ebastine	-0.00010993	-9.01009e-05	-0.000418243	-0.000161594
MAR09315	Exchange of 16-glucuronide-estriol	-0.000107075	-8.77606e-05	-0.000407379	-0.000157397
MAR09316	Exchange of estrone-glucuronide	-0.000107075	-8.77606e-05	-0.000407379	-0.000157397
MAR09318	Exchange of formate	-0.000209124	-0.000171402	-0.000795637	-0.000307406
MAR09319	Exchange of III3Fuc-nLc6Cer	-0.000104829	-8.59195e-05	-0.000398833	-0.000154095
MAR09320	Exchange of glycolipid	-0.000103658	-8.49597e-05	-0.000394378	-0.000152374
MAR09321	Exchange of fucacgalfucgalacglcgalgluside heparan sulfate	-0.000104829	-8.59195e-05	-0.000398833	-0.000154095
MAR09322	Exchange of IV3NeuAc,III3Fuc-nLc4Cer	-0.000103195	-8.45809e-05	-0.000392619	-0.000151694
MAR09323	Exchange of IV3Neu5Ac,III4Fuc-Lc4Cer	-0.000101059	-8.28302e-05	-0.000384493	-0.000148554
MAR09324	Exchange of fucfuc132galacglcgal14acglcgalgluside heparan sulfate	-0.000103658	-8.49597e-05	-0.000394378	-0.000152374
MAR09325	Exchange of fucfucfucgalacglc13galacglcgal14acglcgalgluside heparan sulfate	-0.000103658	-8.49597e-05	-0.000394378	-0.000152374
MAR09326	Exchange of fucfucfucgalacglcgal14acglcgalgluside heparan sulfate	-0.000103658	-8.49597e-05	-0.000394378	-0.000152374
MAR09327	Exchange of lacto-N-fucopentaosyl-III-ceramide	-0.000103658	-8.49597e-05	-0.000394378	-0.000152374
MAR09328	Exchange of fucgalfucgalacglcgalgluside heparan sulfate	-0.000103658	-8.49597e-05	-0.000394378	-0.000152374
MAR09329	Exchange of fucosyl-galactosylgloboside	-0.000103658	-8.49597e-05	-0.000394378	-0.000152374
MAR09331	Exchange of gal-glcnac-gal-globoside	-0.000103658	-8.49597e-05	-0.000394378	-0.000152374
MAR09332	Exchange of galfuc12gal14acglcgalgluside heparan sulfate	-0.000103658	-8.49597e-05	-0.000394378	-0.000152374
MAR09334	Exchange of galgalfucfucgalacglcgalacglcgal14acglcgalgluside heparan sulfate	-0.000103658	-8.49597e-05	-0.000394378	-0.000152374
MAR09335	Exchange of galgalgalthcrm heparan sulfate	-0.000103658	-8.49597e-05	-0.000394378	-0.000152374
MAR09337	Exchange of GD1beta	-9.99366e-05	-8.19099e-05	-0.000380221	-0.000146904
MAR09339	Exchange of GD1c	-9.80147e-05	-8.03347e-05	-0.000372909	-0.000144079
MAR09340	Exchange of GDP	-0.000124521	-0.000102059	-0.000473754	-0.000183042
MAR09341	Exchange of betaine	-0.000105402	-8.63894e-05	-0.000401014	-0.000154938
MAR09343	Exchange of GMP	-0.000107808	-8.83617e-05	-0.000410169	-0.000158475
MAR09344	Exchange of GP1c	-9.69973e-05	-7.95008e-05	-0.000369038	-0.000142583
MAR09345	Exchange of GP1calpha	-9.69973e-05	-7.95008e-05	-0.000369038	-0.000142583
MAR09346	Exchange of GQ1b	-9.80147e-05	-8.03347e-05	-0.000372909	-0.000144079
MAR09347	Exchange of GQ1balpha	-9.76125e-05	-8.0005e-05	-0.000371378	-0.000143487
MAR09348	Exchange of guanosine	-0.000107075	-8.77606e-05	-0.000407379	-0.000157397
MAR09349	Exchange of GT1a	-9.80147e-05	-8.03347e-05	-0.000372909	-0.000144079
MAR09355	Exchange of 4-hydroxy-17beta-estradiol	-0.000221803	-0.000181794	-0.000843876	-0.000326044
MAR09359	Exchange of IDP	-0.000105567	-8.65245e-05	-0.000401641	-0.00015518
MAR09361	Exchange of inositol	-0.0988386	-0.0988199	-0.0991293	-0.0988873
MAR09363	Exchange of cystine	-0.579322	-0.579322	-0.579322	-0.579322
MAR09365	Exchange of leukotriene B4	-0.00021415	-0.000175521	-0.000814758	-0.000314794
MAR09367	Exchange of LTD4	-0.000107808	-8.83617e-05	-0.000410169	-0.000158475
MAR09368	Exchange of leukotriene E4	-0.000112674	-9.23494e-05	-0.00042868	-0.000165627
MAR09372	Exchange of methanol	-0.000112674	-9.23494e-05	-0.00042868	-0.000165627
MAR09377	Exchange of NADP+	-0.000214699	-0.000175971	-0.000816847	-0.000315601
MAR09378	Exchange of nicotinamide	-0.00802277	-0.00800346	-0.00832308	-0.00807309
MAR09384	Exchange of 9-O-acetylated-GD3	-0.000103195	-8.45809e-05	-0.000392619	-0.000151694
MAR09385	Exchange of 9-O-acetylated-GT3	-0.000103195	-8.45809e-05	-0.000392619	-0.000151694
MAR09386	Exchange of hydroxide	-0.000108179	-8.86654e-05	-0.000411579	-0.00015902
MAR09394	Exchange of D-proline	-0.000116431	-9.5429e-05	-0.000442975	-0.00017115
MAR09400	Exchange of pyridoxal	-0.00115667	-0.00115667	-0.00115667	-0.00115667
MAR09404	Exchange of retinoate	-0.000105402	-8.63894e-05	-0.000401014	-0.000154938
MAR09410	Exchange of sphinganine-1-phosphate	-0.000107075	-8.77606e-05	-0.000407379	-0.000157397
MAR09411	Exchange of sphingosine-1-phosphate	-0.000107075	-8.77606e-05	-0.000407379	-0.000157397
MAR09415	Exchange of succinate	-0.000212911	-0.000174505	-0.000810043	-0.000312972
MAR09421	Exchange of THF	-0.000107808	-8.83617e-05	-0.000410169	-0.000158475
MAR09423	Exchange of thymidine	-0.000107075	-8.77606e-05	-0.000407379	-0.000157397
MAR09430	Exchange of testosterone glucuronide	-0.000107075	-8.77606e-05	-0.000407379	-0.000157397
MAR09432	Exchange of thiosulfate	-0.00010993	-9.01009e-05	-0.000418243	-0.000161594
MAR09436	Exchange of UMP	-9.95058e-05	-8.15568e-05	-0.000378582	-0.000146271
MAR09438	Exchange of urea	-0.00021415	-0.000175521	-0.000814758	-0.000314794
MAR09439	Exchange of uridine	-0.000318978	-0.000261441	-0.00121359	-0.000468889
MAR09681	Exchange of L-iduronic acid	-0.000106328	-8.71483e-05	-0.000404537	-0.000156299
MAR09691	Exchange of pyridoxal-phosphate	-0.000107075	-8.77606e-05	-0.000407379	-0.000157397
MAR09692	Exchange of spermine dialdehyde	-0.00022014	-0.000180431	-0.000837549	-0.000323599
MAR09693	Exchange of xanthurenate	-0.000107075	-8.77606e-05	-0.000407379	-0.000157397
MAR09694	Exchange of homovanillate	-0.000107075	-8.77606e-05	-0.000407379	-0.000157397
MAR09713	Exchange of 4-hydroxyretinoic acid	-0.000115311	-9.45114e-05	-0.000438716	-0.000169504
MAR09730	Exchange of albumin	-1e-07	-1e-07	-1e-07	-1e-07
MAR00566	Exchange of adrenic acid	-0.000107075	-8.77606e-05	-0.000407379	-0.000157397
MAR00567	Exchange of eicosanoate	-0.000210733	-0.00017272	-0.000801757	-0.000309771
MAR00568	Exchange of arachidonate	-0.000107075	-8.77606e-05	-0.000407379	-0.000157397
MAR00583	Exchange of elaidate	-0.000107075	-8.77606e-05	-0.000407379	-0.000157397
MAR00585	Exchange of Ley Glycolipid	-9.99366e-05	-8.19099e-05	-0.000380221	-0.000146904
MAR00595	Exchange of Leb Glycolipid	-9.99366e-05	-8.19099e-05	-0.000380221	-0.000146904
MAR00621	Exchange of lignocerate	-0.000210733	-0.00017272	-0.000801757	-0.000309771
MAR00639	Exchange of stearate	-0.000210733	-0.00017272	-0.000801757	-0.000309771
MAR00656	Exchange of PE-LD pool	-0.000115311	-9.45114e-05	-0.000438716	-0.000169504
MAR01912	Exchange of dGMP	-5.44175e-05	-4.46016e-05	-0.000207038	-7.99922e-05
MAR01921	Exchange of glycerone	-0.000111315	-9.12363e-05	-0.000423513	-0.000163631
MAR01923	Exchange of dTMP	-6.73774e-05	-5.52238e-05	-0.000256345	-9.90429e-05
MAR01946	Exchange of formaldehyde	-0.000438315	-0.000359251	-0.00166762	-0.00064431
MAR01965	Exchange of coproporphyrinogen I	-0.000119351	-9.78223e-05	-0.000454085	-0.000175443
MAR01986	Exchange of UDP-glucose	-0.000111315	-9.12363e-05	-0.000423513	-0.000163631
MAR04094	Exchange of prostaglandin I2	-0.000107075	-8.77606e-05	-0.000407379	-0.000157397
MAR04140	Exchange of [apotransferin]	-1e-07	-1e-07	-1e-07	-1e-07
MAR04146	Exchange of taurolithocholate	-0.000107075	-8.77606e-05	-0.000407379	-0.000157397
MAR04148	Exchange of glycolithocholate	-0.000107075	-8.77606e-05	-0.000407379	-0.000157397
MAR04286	Exchange of spermidine dialdehyde	-0.000217502	-0.000178269	-0.000827513	-0.000319722
MAR04289	Exchange of hypothiocyanite	-0.000225481	-0.000184809	-0.000857871	-0.000331451
MAR04298	Exchange of beta-casomorphin (1-6)	-0.000115311	-9.45114e-05	-0.000438716	-0.000169504
MAR04307	Exchange of neocasomorphin (1-5)	-0.000115311	-9.45114e-05	-0.000438716	-0.000169504
MAR04311	Exchange of apelin-(1-12)	-0.000115311	-9.45114e-05	-0.000438716	-0.000169504
MAR04334	Exchange of Cyanate	-0.000658922	-0.000540065	-0.00250695	-0.000968597
MAR04339	Exchange of 3-UMP	-0.000115311	-9.45114e-05	-0.000438716	-0.000169504
MAR04349	Exchange of kinetensin 1-7	-0.000115311	-9.45114e-05	-0.000438716	-0.000169504
MAR04353	Exchange of kinetensin 1-8	-0.000115311	-9.45114e-05	-0.000438716	-0.000169504
MAR04359	Exchange of neuromedin N(1-4)	-0.000115311	-9.45114e-05	-0.000438716	-0.000169504
MAR04366	Exchange of N-acetyl-seryl-aspartate	-0.000115311	-9.45114e-05	-0.000438716	-0.000169504
MAR04369	Exchange of lysyl-proline	-0.000115311	-9.45114e-05	-0.000438716	-0.000169504
MAR04376	Exchange of nitryl-chloride	-0.000342838	-0.000280996	-0.00130437	-0.000503961
MAR04378	Exchange of gamma-CEHC-glucuronide	-0.000107075	-8.77606e-05	-0.000407379	-0.000157397
MAR04380	Exchange of gamma-carboxyethyl-hydroxychroman	-0.000107075	-8.77606e-05	-0.000407379	-0.000157397
MAR04389	Exchange of D-galactosyl-N-acylsphingosine	-0.00021415	-0.000175521	-0.000814758	-0.000314794
MAR04392	Exchange of alloxan	-0.000107075	-8.77606e-05	-0.000407379	-0.000157397
MAR04395	Exchange of CDP-ethanolamine	-0.000115311	-9.45114e-05	-0.000438716	-0.000169504
MAR04405	Exchange of alpha-CEHC-glucuronide	-0.000107075	-8.77606e-05	-0.000407379	-0.000157397
MAR04407	Exchange of 3-carboxy-alpha-chromanol	-0.000213202	-0.000174745	-0.000811153	-0.000313401
MAR04815	Exchange of 3-Hydroxy Butyryl Carnitine	-0.000107075	-8.77606e-05	-0.000407379	-0.000157397
MAR04820	Exchange of 3-Hydroxydodecanoylcarnitine	-0.000101059	-8.28302e-05	-0.000384493	-0.000148554
MAR04821	Exchange of 3-Hydroxydecanoylcarnitine	-0.000101059	-8.28302e-05	-0.000384493	-0.000148554
MAR04822	Exchange of 3-Hydroxyhexadecenoylcarnitine	-0.000101059	-8.28302e-05	-0.000384493	-0.000148554
MAR04823	Exchange of 3-Hydroxyhexadecanoylcarnitine	-0.000101059	-8.28302e-05	-0.000384493	-0.000148554
MAR04824	Exchange of 3-Hydroxy-Isovaleryl Carnitine	-0.000101059	-8.28302e-05	-0.000384493	-0.000148554
MAR04825	Exchange of 3-Hydroxyoctadecadienoylcarnitine	-0.000101059	-8.28302e-05	-0.000384493	-0.000148554
MAR04826	Exchange of 3-Hydroxyoctadecanoyl Carnitine	-0.000101059	-8.28302e-05	-0.000384493	-0.000148554
MAR04827	Exchange of 3-Hydroxy-Octadecenoyl Carnitine	-0.000101059	-8.28302e-05	-0.000384493	-0.000148554
MAR04828	Exchange of 3-Hydroxy-Tetradecanoyl Carnitine	-0.000101059	-8.28302e-05	-0.000384493	-0.000148554
MAR04829	Exchange of 3-Hydroxy Tetradecenoyl-7-Carnitine	-0.000101059	-8.28302e-05	-0.000384493	-0.000148554
MAR04830	Exchange of 3-Hydroxy Trans7,10-Hexadecadienoyl Carnitine	-0.000101059	-8.28302e-05	-0.000384493	-0.000148554
MAR04853	Exchange of 3-Hydroxy Trans5,8Tetradecadienoyl Carnitine	-0.000101059	-8.28302e-05	-0.000384493	-0.000148554
MAR04857	Exchange of Decenoyl Carnitine	-0.000107075	-8.77606e-05	-0.000407379	-0.000157397
MAR04859	Exchange of Decanoyl Carnitine	-0.000111315	-9.12363e-05	-0.000423513	-0.000163631
MAR04866	Exchange of Sebacoyl Carnitine	-0.000103195	-8.45809e-05	-0.000392619	-0.000151694
MAR04869	Exchange of Dodecanedioyl Carnitine	-0.000103195	-8.45809e-05	-0.000392619	-0.000151694
MAR04884	Exchange of Hexadecanedioic Acid Mono-L-Carnitine Ester	-0.000101059	-8.28302e-05	-0.000384493	-0.000148554
MAR04891	Exchange of Succinyl Carnitine	-0.000103195	-8.45809e-05	-0.000392619	-0.000151694
MAR04895	Exchange of Tiglyl Carnitine	-0.000103658	-8.49597e-05	-0.000394378	-0.000152374
MAR04897	Exchange of Glutaryl Carnitine	-0.00011007	-9.02155e-05	-0.000418774	-0.0001618
MAR04899	Exchange of Hexanoyl Carnitine	-0.000103195	-8.45809e-05	-0.000392619	-0.000151694
MAR04901	Exchange of Adipoyl Carnitine	-0.000103195	-8.45809e-05	-0.000392619	-0.000151694
MAR04909	Exchange of Octenoyl Carnitine	-0.000107075	-8.77606e-05	-0.000407379	-0.000157397
MAR04920	Exchange of Suberyl Carnitine	-0.000103195	-8.45809e-05	-0.000392619	-0.000151694
MAR04921	Exchange of Dodecenoyl Carnitine	-0.000107075	-8.77606e-05	-0.000407379	-0.000157397
MAR04925	Exchange of Decadienoyl Carnitine	-0.000107075	-8.77606e-05	-0.000407379	-0.000157397
MAR04929	Exchange of behenic acid	-0.000210733	-0.00017272	-0.000801757	-0.000309771
MAR04943	Exchange of Isovaleryl Carnitine	-0.000103658	-8.49597e-05	-0.000394378	-0.000152374
MAR04950	Exchange of Tetradecadienoyl Carnitine	-0.000107075	-8.77606e-05	-0.000407379	-0.000157397
MAR04965	Exchange of Tetradecenoyl Carnitine	-0.000107075	-8.77606e-05	-0.000407379	-0.000157397
MAR08386	Exchange of trans-4-hydroxy-L-proline	-0.000107075	-8.77606e-05	-0.000407379	-0.000157397
MAR08961	Exchange of dephospho-CoA	-0.00010993	-9.01009e-05	-0.000418243	-0.000161594
MAR08962	Exchange of FMN	-0.000214874	-0.000176115	-0.000817515	-0.000315859
MAR09028	Exchange of anthranilate	-0.000111315	-9.12363e-05	-0.000423513	-0.000163631
MAR09843	Exchange of 5-hydroxyindoleacetate	-0.000104829	-8.59195e-05	-0.000398833	-0.000154095
MAR09845	Exchange of phosphocholine	-0.000314486	-0.000257758	-0.0011965	-0.000462285
MAR09846	Exchange of L-cystathionine	-0.00010993	-9.01009e-05	-0.000418243	-0.000161594
MAR09852	Exchange of guanidinoacetate	-0.000112535	-9.22357e-05	-0.000428152	-0.000165423
MAR09855	Exchange of 4-hydroxy-2-quinolinecarboxylic acid	-0.000219748	-0.00018011	-0.000836059	-0.000323024
MAR09856	Exchange of L-2-aminoadipate	-0.000112674	-9.23494e-05	-0.00042868	-0.000165627
MAR09858	Exchange of PEP	-0.000110279	-9.03869e-05	-0.00041957	-0.000162107
MAR09862	Exchange of 3-phospho-D-glycerate	-0.000107808	-8.83617e-05	-0.000410169	-0.000158475
MAR09868	Exchange of sn-glycerol-3-phosphate	-0.000108179	-8.86654e-05	-0.000411579	-0.00015902
MAR09922	Exchange of (6Z,9Z)-octadecadienoylcarnitine	-0.000103658	-8.49597e-05	-0.000394378	-0.000152374
MAR10190	Exchange of 4-acetamidobutanoate	-0.000219748	-0.00018011	-0.000836059	-0.000323024
MAR10194	Exchange of 5(S)-HPETE	-0.00021415	-0.000175521	-0.000814758	-0.000314794
MAR10212	Exchange of lipoxin B4	-0.000109227	-8.95246e-05	-0.000415568	-0.000160561
MAR10215	Exchange of 11,12-EET	-0.000107075	-8.77606e-05	-0.000407379	-0.000157397
MAR10220	Exchange of 5beta-cholestane-3alpha,7alpha,12alpha,24s,25-pentol	-0.00010993	-9.01009e-05	-0.000418243	-0.000161594
MAR10230	Exchange of androsterone sulfate	-0.000218109	-0.000178766	-0.000829821	-0.000320614
MAR10231	Exchange of 5,12,20-TriHETE	-0.000109227	-8.95246e-05	-0.000415568	-0.000160561
MAR10262	Exchange of (R)-mevalonate	-0.000111315	-9.12363e-05	-0.000423513	-0.000163631
MAR10263	Exchange of inositol-1-phosphate	-0.000104829	-8.59195e-05	-0.000398833	-0.000154095
MAR10346	Exchange of thromboxane B2	-0.000110668	-9.07056e-05	-0.00042105	-0.000162679
MAR10428	Exchange of 5-aminolevulinate	-0.000115311	-9.45114e-05	-0.000438716	-0.000169504
MAR10430	Exchange of N-acetyl-L-glutamate	-0.000111315	-9.12363e-05	-0.000423513	-0.000163631
MAR10432	Exchange of cis-gondoic acid	-0.000107075	-8.77606e-05	-0.000407379	-0.000157397
MAR10437	Exchange of L-cysteate	-0.000162609	-0.000133277	-0.000618664	-0.00023903
MAR10475	Exchange of benzoate	-0.000111315	-9.12363e-05	-0.000423513	-0.000163631
MAR10478	Exchange of Indoxyl Sulfate	-0.00010993	-9.01009e-05	-0.000418243	-0.000161594
MAR10503	Exchange of Arginyl-Alanyl-Alanine	-0.000112674	-9.23494e-05	-0.00042868	-0.000165627
MAR10513	Exchange of Arginyl-Glycyl-Glycine	-0.000115311	-9.45114e-05	-0.000438716	-0.000169504
MAR10693	Exchange of Tryptophanyl-Glycyl-Leucine	-0.00010993	-9.01009e-05	-0.000418243	-0.000161594
MAR10694	Exchange of Tryptophanyl-Glycyl-Phenylalanine	-0.00010993	-9.01009e-05	-0.000418243	-0.000161594
MAR10704	Exchange of Tryptophanyl-Prolyl-Glycine	-0.00010993	-9.01009e-05	-0.000418243	-0.000161594
MAR11348	Exchange of N-acetylneuraminate	-0.000119042	-9.75692e-05	-0.00045291	-0.000174988
MAR11352	Exchange of phosphatidate-LD-TAG pool	-0.0004283	-0.000351042	-0.00162952	-0.000629588
MAR11385	Exchange of 7alpha-hydroxycholest-4-en-3-one	-0.000107075	-8.77606e-05	-0.000407379	-0.000157397
MAR11420	Exchange of NH4+	-0.0004283	-0.000351042	-0.00162952	-0.000629588
MAR11423	Exchange of D-glucarate	-0.000222386	-0.000182272	-0.000846095	-0.000326901
MAR11424	Exchange of glucuronate	-0.000104994	-8.60551e-05	-0.000399462	-0.000154338
MAR11426	Exchange of putrescine	-0.000214759	-0.00017602	-0.000817075	-0.000315689
MAR11441	Exchange of lanosterol	-9.99366e-05	-8.19099e-05	-0.000380221	-0.000146904
MAR11848	Exchange of 4-androstene-3,17-dione	-0.000107075	-8.77606e-05	-0.000407379	-0.000157397
MAR11850	Exchange of dehydroepiandrosterone	-0.000107075	-8.77606e-05	-0.000407379	-0.000157397
MAR11864	Exchange of 21-hydroxyallopregnanolone	-0.00010993	-9.01009e-05	-0.000418243	-0.000161594
MAR11865	Exchange of 11-deoxycortisol	-0.000110488	-9.05578e-05	-0.000420363	-0.000162414
MAR11866	Exchange of 11-deoxycorticosterone	-0.000109242	-8.95371e-05	-0.000415626	-0.000160583
MAR11867	Exchange of pregnenolone	-0.000323141	-0.000264852	-0.00122943	-0.000475008
MAR11870	Exchange of 17alpha-hydroxypregnenolone	-0.00021415	-0.000175521	-0.000814758	-0.000314794
MAR11895	Exchange of 13-cis-retinoate	-0.000107075	-8.77606e-05	-0.000407379	-0.000157397
MAR11902	Exchange of 3,4-dihydroxymandelate	-0.000107075	-8.77606e-05	-0.000407379	-0.000157397
MAR11909	Exchange of 5,15-DiHETE	-0.00021415	-0.000175521	-0.000814758	-0.000314794
MAR11947	Exchange of sphingosine	-0.00032869	-0.0002694	-0.00125054	-0.000483164
MAR11951	Exchange of imidazole-4-acetate	-0.000217502	-0.000178269	-0.000827513	-0.000319722
MAR11957	Exchange of quinonoid dihydrobiopterin	-0.000200655	-0.000164461	-0.000763415	-0.000294957
MAR11959	Exchange of sphinganine	-0.00022227	-0.000182177	-0.000845653	-0.000326731
MAR11965	Exchange of calcitriol	-0.000115311	-9.45114e-05	-0.000438716	-0.000169504
MAR11990	Exchange of apoC1	-0.000107075	-8.77606e-05	-0.000407379	-0.000157397
MAR11993	Exchange of apoC2	-0.000107075	-8.77606e-05	-0.000407379	-0.000157397
MAR11996	Exchange of apoC3	-0.000107075	-8.77606e-05	-0.000407379	-0.000157397
MAR12030	Exchange of 5-S-glutathionyl-dopamine	-0.000103658	-8.49597e-05	-0.000394378	-0.000152374
MAR12042	Exchange of GD3	-9.99366e-05	-8.19099e-05	-0.000380221	-0.000146904
MAR12104	Exchange of CMP-N-acetylneuraminate	-0.000104829	-8.59195e-05	-0.000398833	-0.000154095
MAR12114	Exchange of 3,4-Dihydroxyphenylethanol	-0.000116055	-9.51212e-05	-0.000441546	-0.000170598
MAR12129	Exchange of 5-S-glutathionyl-L-dopa	-0.000107075	-8.77606e-05	-0.000407379	-0.000157397
MAR12132	Exchange of Galactosyl Glucosyl Ceramide	-0.000103146	-8.454e-05	-0.000392429	-0.000151621
MAR12135	Exchange of GM2alpha	-0.000107075	-8.77606e-05	-0.000407379	-0.000157397
MAR12136	Exchange of Ganglioside Gm1	-0.000200996	-0.00016474	-0.000764713	-0.000295458
MAR12205	Exchange of Cholic acid-24glucuronide, CA-24G	-0.000104829	-8.59195e-05	-0.000398833	-0.000154095
MAR12207	Exchange of Chenodeoxycholic acid-24glucuronide, CDCA-24G	-0.000104829	-8.59195e-05	-0.000398833	-0.000154095
MAR12208	Exchange of Chenodeoxycholic acid-3glucuronide, CDCA-3G	-0.000104829	-8.59195e-05	-0.000398833	-0.000154095
MAR12210	Exchange of Deoxycholic acid-24glucuronide, CDA-24G	-0.000107075	-8.77606e-05	-0.000407379	-0.000157397
MAR12211	Exchange of Deoxycholic acid-3glucuronide, CDA-3G	-0.000107075	-8.77606e-05	-0.000407379	-0.000157397
MAR12217	Exchange of Hyocholic acid-24glucuronide, HCA-24G	-0.000107075	-8.77606e-05	-0.000407379	-0.000157397
MAR12218	Exchange of Hyocholic acid-6glucuronide, HCA-6G	-0.000107075	-8.77606e-05	-0.000407379	-0.000157397
MAR12219	Exchange of Hyodeoxycholic acid-24glucuronide, HDCA-24G	-0.000107075	-8.77606e-05	-0.000407379	-0.000157397
MAR12220	Exchange of Hyodeoxycholic acid-6glucuronide, HDCA-6G	-0.000107075	-8.77606e-05	-0.000407379	-0.000157397
MAR12224	Exchange of Lithocholic acid-24glucuronide, CDCA-24G	-0.000107075	-8.77606e-05	-0.000407379	-0.000157397
MAR12225	Exchange of Lithocholic acid-3glucuronide, CDCA-3G	-0.000107075	-8.77606e-05	-0.000407379	-0.000157397
MAR12584	Exchange of 1'-OH-midazolam-glucuronide	-9.99366e-05	-8.19099e-05	-0.000380221	-0.000146904
MAR12604	Exchange of 3-hydroxy-acetaminophen	-0.000107624	-8.82107e-05	-0.000409468	-0.000158204
MAR12613	Exchange of 5-hydroxy-fluvastatin-glucuronide	-0.000107075	-8.77606e-05	-0.000407379	-0.000157397
MAR12624	Exchange of 6-hydroxy-fluvastatin	-0.000109227	-8.95246e-05	-0.000415568	-0.000160561
MAR12625	Exchange of 6-hydroxy-fluvastatin-glucuronide	-0.000107075	-8.77606e-05	-0.000407379	-0.000157397
MAR12636	Exchange of AM1Ac (cyclosporine)	-0.000107075	-8.77606e-05	-0.000407379	-0.000157397
MAR12642	Exchange of AM1c-glucuronide (cyclosporine)	-0.000107075	-8.77606e-05	-0.000407379	-0.000157397
MAR12651	Exchange of S-carboxy ibuprofen glucuronide	-0.000103658	-8.49597e-05	-0.000394378	-0.000152374
MAR12660	Exchange of deoxy-fluvastatin-dinor	-0.000105402	-8.63894e-05	-0.000401014	-0.000154938
MAR12661	Exchange of N-desisopropyl-fluvastatin	-0.000108802	-8.91761e-05	-0.00041395	-0.000159936
MAR12664	Exchange of 31-O-Desmethyl,19-Hydroxy,37, 39-Epoxy-tacrolimus	-0.000106511	-8.72987e-05	-0.000405235	-0.000156569
MAR12667	Exchange of des-isopropyl-dihydro-fluvastatin-tetranor-glucuronide	-0.000107075	-8.77606e-05	-0.000407379	-0.000157397
MAR12668	Exchange of glucuronide-conjugate of 3-methoxy-acetaminophen	-0.000104829	-8.59195e-05	-0.000398833	-0.000154095
MAR12670	Exchange of glucuronide-thiomethyl-acetaminophen conjugate	-0.000107075	-8.77606e-05	-0.000407379	-0.000157397
MAR12675	Exchange of Losartan-E3174/ losartan-M6	-0.000103658	-8.49597e-05	-0.000394378	-0.000152374
MAR12677	Exchange of Losartan-N1-glucuronide	-0.000101059	-8.28302e-05	-0.000384493	-0.000148554
MAR12678	Exchange of Losartan-M1	-0.000106511	-8.72987e-05	-0.000405235	-0.000156569
MAR12679	Exchange of Losartan-M2	-0.000106511	-8.72987e-05	-0.000405235	-0.000156569
MAR12680	Exchange of Losartan-M4 (glucuronide derivative)	-0.000103658	-8.49597e-05	-0.000394378	-0.000152374
MAR12681	Exchange of Losartan-M5	-0.000106511	-8.72987e-05	-0.000405235	-0.000156569
MAR12682	Exchange of Losartan-N2-glucuronide / Losartan-M7	-0.000103658	-8.49597e-05	-0.000394378	-0.000152374
MAR12688	Exchange of N-desmethyl-rosuvastatin	-0.000108802	-8.91761e-05	-0.00041395	-0.000159936
MAR12699	Exchange of pitavastatin-M3	-0.000107075	-8.77606e-05	-0.000407379	-0.000157397
MAR12703	Exchange of rosuvastatin-5S-lactone	-9.99366e-05	-8.19099e-05	-0.000380221	-0.000146904
MAR12715	Exchange of Torasemide-M3	-0.000107624	-8.82107e-05	-0.000409468	-0.000158204
MAR12716	Exchange of Torasemide-M5	-0.000107075	-8.77606e-05	-0.000407379	-0.000157397
MAR12718	Exchange of thiomethyl-sulphoxide-acetaminophen-glucuronide	-0.000107075	-8.77606e-05	-0.000407379	-0.000157397
MAR13031	Exchange of 2-arachidonoylglycerol	-0.000107075	-8.77606e-05	-0.000407379	-0.000157397
MAR13046	Exchange of (7Z)-octadecenoic acid	-7.18866e-05	-5.89196e-05	-0.000273501	-0.000105671
MAR13048	Exchange of 10,13,16,19-docosatetraenoic acid	-7.18866e-05	-5.89196e-05	-0.000273501	-0.000105671
MAR13049	Exchange of 10,13,16-docosatriynoic acid	-7.18866e-05	-5.89196e-05	-0.000273501	-0.000105671
MAR13050	Exchange of 12,15,18,21-tetracosatetraenoic acid	-7.18866e-05	-5.89196e-05	-0.000273501	-0.000105671
MAR13067	Exchange of retinyl palmitate	-0.000223657	-0.000223657	-0.000223657	-0.000223657
MAR13068	Exchange of Li+	-0.0004283	-0.000351042	-0.00162952	-0.000629588
MAR13071	Exchange of quinidine	-0.000124921	-0.000102387	-0.000475276	-0.00018363
MAR13074	Exchange of cimetidine	-0.000115311	-9.45114e-05	-0.000438716	-0.000169504
MAR10026	Exchange of chenodiol	-0.000207315	-0.000169919	-0.000788755	-0.000304747
MAR10027	Exchange of LacCer pool	-0.330959	-0.330959	-0.330959	-0.330959
MAR10047	Exchange of 1,2-diacylglycerol-LD-PC pool	-0.000209657	-0.000171839	-0.000797665	-0.00030819
EX_MAM02766e_e_	EX_MAM02766e_e_	-0.000111315	-9.12363e-05	-0.000423513	-0.000163631

## Sheet: AATherT0
AA	Rxns	Fit	LB	UB
Asp	MAR09070	0.0032	0.0028	0.0036
Glu	MAR09071	0.027	0.0162	0.0378
Ser	MAR09069	-0.0879	-0.1867	0.011
Asn	MAR09062	0.0042	0.0033	0.0051
Thr	MAR09044	-0.462	-0.704	-0.2199
Gln	MAR09063	-1.1803	-1.6743	-0.6862
Tyr	MAR09064	0.13	0.0303	0.2298
Gly	MAR09067	0.1559	0.0794	0.2324
Pro	MAR09068	0.0611	0.0256	0.0966
Ala	MAR09061	-0.9542	-1.4422	-0.4661
Met	MAR09042	-0.101	-0.1625	-0.0396
Val	MAR09046	-0.1113	-0.2933	0.0708
Phe	MAR09043	-0.083	-0.2093	0.0433
Trp	MAR09045	-0.042	-0.0889	0.0049
Cystine	MAR09363	0.185	-0.2781	0.6481
His	MAR09038	-0.0763	-0.1403	-0.0122
Lys	MAR09041	-0.168	-0.38	0.044
Arg	MAR09066	-0.267	-0.4036	-0.1303

## Sheet: AATherT1
AA	Rxns	Fit	LB	UB
Asp	MAR09070	0.0025	0.0022	0.0028
Glu	MAR09071	0.0222	0.0133	0.0312
Ser	MAR09069	-0.1119	-0.194	-0.0297
Asn	MAR09062	0.0034	0.0026	0.0041
Thr	MAR09044	-0.5129	-0.7142	-0.3116
Gln	MAR09063	-1.1562	-1.5671	-0.7454
Tyr	MAR09064	0.0495	-0.0335	0.1325
Gly	MAR09067	0.1032	0.0396	0.1669
Pro	MAR09068	0.0308	0.0012	0.0603
Ala	MAR09061	-0.9731	-1.3789	-0.5672
Met	MAR09042	-0.1149	-0.166	-0.0637
Val	MAR09046	-0.1633	-0.3147	-0.0119
Phe	MAR09043	-0.1462	-0.2513	-0.0412
Trp	MAR09045	-0.0541	-0.0931	-0.0151
Cystine	MAR09363	0.1208	-0.2643	0.5059
His	MAR09038	-0.0874	-0.1407	-0.0341
Lys	MAR09041	-0.2445	-0.4208	-0.0682
Arg	MAR09066	-0.2934	-0.407	-0.1797

## Sheet: AATherT3
AA	Rxns	Fit	LB	UB
Asp	MAR09070	0.0013	0.001	0.0015
Glu	MAR09071	0.0141	0.0076	0.0207
Ser	MAR09069	-0.1379	-0.198	-0.0777
Asn	MAR09062	0.0018	0.0013	0.0024
Thr	MAR09044	-0.5593	-0.7067	-0.412
Gln	MAR09063	-1.0741	-1.3748	-0.7734
Tyr	MAR09064	-0.0743	-0.135	-0.0136
Gly	MAR09067	0.0183	-0.0283	0.0649
Pro	MAR09068	-0.0179	-0.0395	0.0038
Ala	MAR09061	-0.9682	-1.2652	-0.6712
Met	MAR09042	-0.1277	-0.1651	-0.0902
Val	MAR09046	-0.2231	-0.3339	-0.1124
Phe	MAR09043	-0.2386	-0.3155	-0.1617
Trp	MAR09045	-0.0681	-0.0966	-0.0395
Cystine	MAR09363	0.0214	-0.2604	0.3033
His	MAR09038	-0.1007	-0.1397	-0.0616
Lys	MAR09041	-0.3374	-0.4664	-0.2083
Arg	MAR09066	-0.3188	-0.4019	-0.2356

## Sheet: AATherT7
AA	Rxns	Fit	LB	UB
Asp	MAR09070	0.0002	-0.0001	0.0004
Glu	MAR09071	0.0083	0.0013	0.0153
Ser	MAR09069	-0.1538	-0.2177	-0.0898
Asn	MAR09062	0.0001	-0.0005	0.0007
Thr	MAR09044	-0.643	-0.7997	-0.4864
Gln	MAR09063	-1.1809	-1.5006	-0.8612
Tyr	MAR09064	-0.2061	-0.2707	-0.1416
Gly	MAR09067	-0.0669	-0.1164	-0.0174
Pro	MAR09068	-0.0766	-0.0996	-0.0536
Ala	MAR09061	-1.1597	-1.4755	-0.8439
Met	MAR09042	-0.1422	-0.182	-0.1024
Val	MAR09046	-0.25	-0.3678	-0.1322
Phe	MAR09043	-0.383	-0.4648	-0.3013
Trp	MAR09045	-0.0804	-0.1108	-0.0501
Cystine	MAR09363	-0.0555	-0.3552	0.2441
His	MAR09038	-0.1301	-0.1715	-0.0886
Lys	MAR09041	-0.4117	-0.5489	-0.2745
Arg	MAR09066	-0.3823	-0.4707	-0.2939

## Sheet: AATherT10
AA	Rxns	Fit	LB	UB
Asp	MAR09070	0.0003	0.0001	0.0004
Glu	MAR09071	0.0108	0.0036	0.0153
Ser	MAR09069	-0.1006	-0.1662	-0.0898
Asn	MAR09062	-0.0004	-0.001	0.0007
Thr	MAR09044	-0.5757	-0.7362	-0.4864
Gln	MAR09063	-1.2897	-1.6174	-0.8612
Tyr	MAR09064	-0.1798	-0.246	-0.1416
Gly	MAR09067	-0.0549	-0.1056	-0.0174
Pro	MAR09068	-0.0809	-0.1045	-0.0536
Ala	MAR09061	-1.2898	-1.6135	-0.8439
Met	MAR09042	-0.1146	-0.1554	-0.1024
Val	MAR09046	-0.1316	-0.2523	-0.1322
Phe	MAR09043	-0.4033	-0.487	-0.3013
Trp	MAR09045	-0.06	-0.0911	-0.0501
Cystine	MAR09363	-0.002	-0.3091	0.2441
His	MAR09038	-0.1335	-0.176	-0.0886
Lys	MAR09041	-0.2869	-0.4275	-0.2745
Arg	MAR09066	-0.3735	-0.4641	-0.2939

## Sheet: AATherT14
AA	Rxns	Fit	LB	UB
Asp	MAR09070	0.0019	0.0016	0.0022
Glu	MAR09071	0.0237	0.0156	0.0318
Ser	MAR09069	0.0603	-0.0141	0.1346
Asn	MAR09062	0.0003	-0.0004	0.001
Thr	MAR09044	-0.2887	-0.4708	-0.1066
Gln	MAR09063	-1.4253	-1.7969	-1.0537
Tyr	MAR09064	0.0446	-0.0305	0.1196
Gly	MAR09067	0.0755	0.0179	0.1331
Pro	MAR09068	-0.0232	-0.0499	0.0035
Ala	MAR09061	-1.3849	-1.752	-1.0178
Met	MAR09042	-0.0223	-0.0686	0.0239
Val	MAR09046	0.2151	0.0782	0.352
Phe	MAR09043	-0.2825	-0.3775	-0.1875
Trp	MAR09045	0.0096	-0.0256	0.0449
Cystine	MAR09363	0.2274	-0.1208	0.5757
His	MAR09038	-0.1058	-0.154	-0.0576
Lys	MAR09041	0.1347	-0.0248	0.2941
Arg	MAR09066	-0.2692	-0.3719	-0.1664

[truncated: 5 more sheets: AAToxT0, AAToxT1, AAToxT3, AAtoxT7, AAToxT10]
